# Supplementary material for: Hydrothermal synthesis, influencing factors and excellent photocatalytic performance of novel nanoparticle-assembled Bi25FeO40tetrahedrons
Source: Royal Society of Chemistry journal article supplement (doi:10.1039/c5ce00743g), 2015-01-01
Supplement: c5ce00743g1.pdf [file c5ce00743g1.pdf]

## Electronic supplementary information

Hydrothermal synthesis, influencing factors and excellent photocatalytic performance of novel nanoparticles-assembled  $\text{Bi}_{25}\text{FeO}_{40}$  tetrahedrons

Lei Zhang,<sup>a,b</sup> Xiang Zhang,<sup>a</sup> Yue Zou,<sup>a</sup> You-He Xu,<sup>a</sup> Cheng-Ling Pan,<sup>\*a,b</sup> Jin-Song Hu<sup>\*a</sup> and Chang-Min Hou<sup>b</sup>

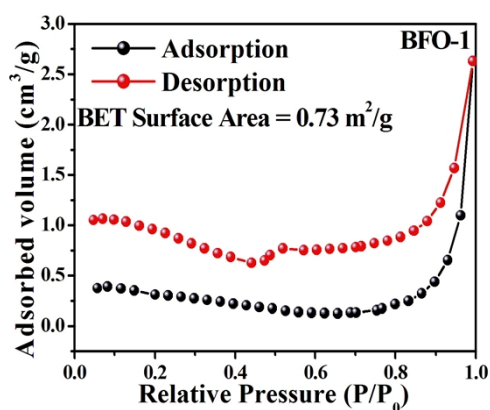

Fig. S1 Nitrogen adsorption-desorption isotherm of BFO-1.

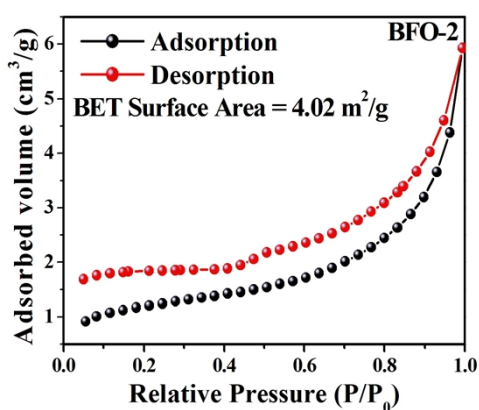

Fig. S2 Nitrogen adsorption-desorption isotherm of BFO-2.

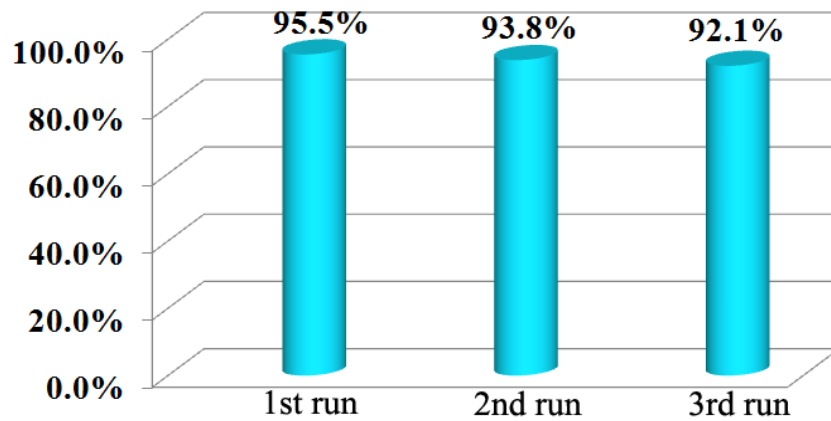

Fig. S3 Degradation efficiencies of RhB over BFO-2 during 3 catalytic runs.

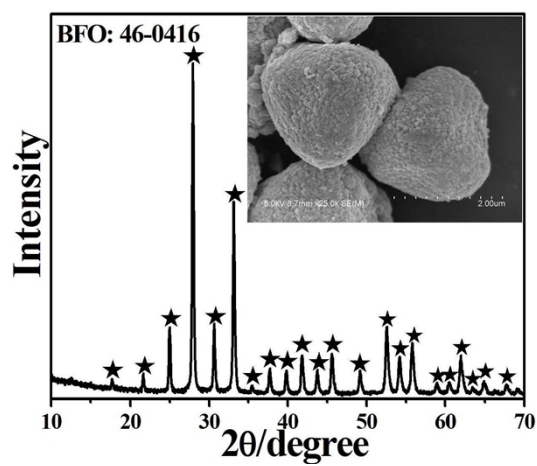

Fig. S4 XRD pattern and SEM image of BFO-2 after photocatalytic reaction.

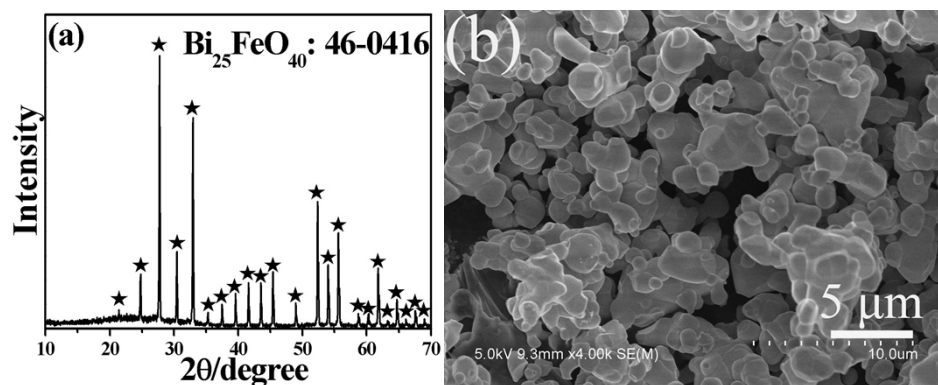

Fig. S5 The XRD pattern (a) and SEM image (b) of the BFO sample prepared via a solid state reaction.
